# Supplementary material
Source: ML conference proceedings conference paper supplement (https://openaccess.thecvf.com/content/WACV2022/html/Huynh_Lightweight_Monocular_Depth_WACV_2022_paper.html)
Supplement: Supplementary file 1 [file Huynh_Lightweight_Monocular_Depth_WACV_2022_supplemental.zip]

# - Supplementary Material -

## Lightweight Monocular Depth with a Novel Neural Architecture Search Method

Lam Huynh<sup>1</sup>    Phong Nguyen<sup>1</sup>    Jiri Matas<sup>2</sup>  
 Esa Rahtu<sup>3</sup>    Janne Heikkilä<sup>1</sup>

<sup>1</sup>University of Oulu

<sup>2</sup>Czech Technical University in Prague

<sup>3</sup>Tampere University

This material provides a comparison between the original tabu search and assisted tabu search in section 1. Section 2 describes a solution to search for good multi-objective balance coefficients  $\alpha$  (Eq. 1 and 4 in the main paper), while more information on the generated network architectures is presented in Section 3.

### 1. Experiment with the original tabu search (TS) and assisted tabu search (ATS)

Tabu search [3] is a robust metaheuristic procedure for solving combinatorial optimization problems consisting of two distinguishing features. First, it prohibits reversal moves to discourage the search from coming back to previously-visited solutions. Second, it accepts degenerating moves if improving movement is unavailable to avoid being trap in local minima. Figure 1 presents a simplified flowchart of the tabu search. By iteratively making *good moves*, it is more likely to reach optimized solutions.

However, directly employing tabu search for architecture exploration is expensive as the evaluation process (Figure 1, orange box) typically requires training and validation on the whole dataset. For comparison, we utilize the original tabu search (TS) and assisted tabu search (ATS) to perform architecture search for 20 iterations from one parent network. The result in Table 1 demonstrates the efficacy of ATS as the search using ATS runs  $\sim 7$  times faster while producing comparable results to the TS instance.

### 2. Searching for a good balance coefficient ( $\alpha$ )

Determining a good balance coefficient value ( $\alpha$ ) for Eq.1 and 4 in the main paper is crucial as it greatly affects

Table 1. Searching for 20 iterations from one parent network using tabu search (TS) and assisted tabu search (ATS) on the NYU-Depth-v2 dataset.

| Method | Search Time    | REL↓  | RMSE↓ | $\delta_1$ ↑ |
|--------|----------------|-------|-------|--------------|
| w/ TS  | 24.4 GPU hours | 0.161 | 0.554 | 0.753        |
| w/ ATS | 3.4 GPU hours  | 0.162 | 0.557 | 0.751        |

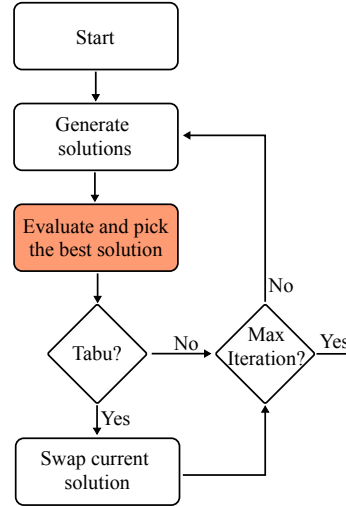

Figure 1. A simple flowchart of tabu search.

the search performance. To this end, we perform grid search on randomly subsampled sets from the training data seeking for the optimized  $\alpha$  value. The pattern in Figure 2 shows that, for NYU-Depth-v2 [4], KITTI [2], and ScanNet [1], approximately good  $\alpha$  values range from 0.55 to 0.6. Additionally, the grid search is much faster (took  $\sim 15$  hours on one dataset), enabling finding good  $\alpha$  values when deploying to different datasets.

### 3. Generated Architectures

Table 2, 3, 4 illustrate the generated LiDNAS-N, LiDNAS-K, LiDNAS-S architectures for NYU-Depth-v2, KITTI and ScanNet, respectively. As expected, the networks consist of various layers with some typical operations as shown in Figure 3.

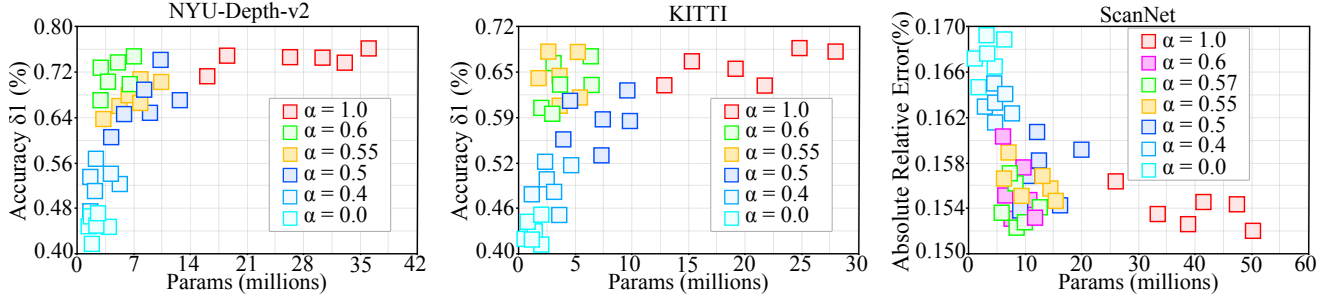

Figure 2. Grid search using randomly subsampled sets from the training data to look for good balance coefficient values on NYU-Depth-v2 (left), KITTI (center), and ScanNet (right).

Table 2. Detailed structure of an LiDNAS-N instance. MBConv denotes mobile inverted residual block, SepConv indicates depthwise separable convolution, and SE is squeeze-and-excitation module (see Figure 3 for more details).  $n$  is the number of layers within the block,  $t$  is the expansion factor of the MBConv module, and  $k$  is the kernel size. #in and #out are the number of input and output channels.

| Input                         | Operations           | $n$ | $t$ | $k$ | #in | #out | Resolutions | Output             |
|-------------------------------|----------------------|-----|-----|-----|-----|------|-------------|--------------------|
| <i>image</i>                  | Conv2d (k3x3)        | 2   | -   | 3   | 3   | 16   | 304x228     | <i>en_blk_11</i>   |
| <i>en_blk_11</i>              | MBConv (t6,k3x3)     | 3   | 6   | 3   | 16  | 32   | 304x228     | <i>en_blk_12</i>   |
| <i>en_blk_12(//)up_blk_27</i> | MBConv, SE (t3,k5x5) | 3   | 3   | 5   | 64  | 56   | 304x228     | <i>de_blk_13</i>   |
| <i>de_blk_13</i>              | MBConv (t7,k3x3)     | 2   | 7   | 3   | 56  | 64   | 304x228     | <i>de_blk_14</i>   |
| <i>de_blk_14</i>              | MBConv (t6,k5x5)     | 3   | 6   | 5   | 64  | 1    | 304x228     | <i>depth_1</i>     |
| <i>down(en_blk_12)</i>        | SepConv (k3x3)       | 2   | -   | 3   | 32  | 16   | 152x114     | <i>down_blk_26</i> |
| <i>up(de_blk_24)</i>          | MBConv (t6,k3x3)     | 1   | 6   | 3   | 72  | 32   | 304x228     | <i>up_blk_27</i>   |
| <i>down_blk_26</i>            | MBConv (t5,k3x3)     | 2   | 5   | 3   | 16  | 32   | 152x114     | <i>en_blk_21</i>   |
| <i>en_blk_21</i>              | MBConv, SE (t3,k5x5) | 1   | 3   | 5   | 32  | 48   | 152x114     | <i>en_blk_22</i>   |
| <i>en_blk_12, up_blk_37</i>   | MBConv (t7,k3x3)     | 1   | 7   | 3   | 62  | 64   | 152x114     | <i>de_blk_23</i>   |
| <i>de_blk_23</i>              | MBConv, SE (t3,k5x5) | 2   | 3   | 5   | 64  | 72   | 152x114     | <i>de_blk_24</i>   |
| <i>de_blk_24</i>              | MBConv (t6,k3x3)     | 2   | 6   | 3   | 72  | 1    | 152x114     | <i>depth_2</i>     |
| <i>down(en_blk_22)</i>        | MBConv (t6,k5x5)     | 1   | 6   | 5   | 48  | 32   | 76x52       | <i>down_blk_36</i> |
| <i>up(de_blk_34)</i>          | MBConv (t6,k3x3)     | 1   | 6   | 3   | 96  | 14   | 152x114     | <i>up_blk_37</i>   |
| <i>down_blk_36</i>            | MBConv (t7,k3x3)     | 1   | 7   | 3   | 32  | 48   | 76x52       | <i>en_blk_31</i>   |
| <i>en_blk_31</i>              | SepConv (k3x3)       | 2   | -   | 3   | 48  | 56   | 76x52       | <i>en_blk_32</i>   |
| <i>en_blk_32, up_blk_47</i>   | MBConv (t5,k3x3)     | 1   | 5   | 3   | 74  | 72   | 76x52       | <i>de_blk_33</i>   |
| <i>de_blk_33</i>              | MBConv (t7,k3x3)     | 1   | 7   | 3   | 72  | 96   | 76x52       | <i>de_blk_34</i>   |
| <i>de_blk_34</i>              | MBConv (t3,k5x5)     | 2   | 3   | 5   | 96  | 1    | 76x52       | <i>depth_3</i>     |
| <i>down(en_blk_32)</i>        | MBConv (t6,k3x3)     | 1   | 6   | 3   | 56  | 48   | 37x26       | <i>down_blk_46</i> |
| <i>up(de_blk_44)</i>          | MBConv (t6,k5x5)     | 1   | 6   | 5   | 112 | 18   | 76x52       | <i>up_blk_47</i>   |
| <i>down_blk_46</i>            | SepConv (k3x3)       | 3   | -   | 3   | 48  | 56   | 37x26       | <i>en_blk_41</i>   |
| <i>en_blk_41</i>              | MBConv, SE (t3,k5x5) | 1   | 3   | 5   | 56  | 64   | 37x26       | <i>en_blk_42</i>   |
| <i>en_blk_42, up_blk_57</i>   | MBConv, SE (t3,k5x5) | 2   | 3   | 5   | 80  | 96   | 37x26       | <i>de_blk_43</i>   |
| <i>de_blk_43</i>              | MBConv (t6,k3x3)     | 1   | 6   | 3   | 96  | 112  | 37x26       | <i>de_blk_44</i>   |
| <i>de_blk_44</i>              | MBConv (t6,k3x3)     | 2   | 6   | 3   | 112 | 1    | 37x26       | <i>depth_4</i>     |
| <i>down(en_blk_42)</i>        | MBConv (t6,k5x5)     | 1   | 6   | 5   | 64  | 56   | 19x15       | <i>down_blk_56</i> |
| <i>up(de_blk_54)</i>          | SepConv (k3x3)       | 1   | -   | 3   | 112 | 16   | 37x26       | <i>up_blk_57</i>   |
| <i>down_blk_56</i>            | MBConv, SE (t3,k5x5) | 1   | 3   | 5   | 56  | 64   | 19x15       | <i>en_blk_51</i>   |
| <i>en_blk_51</i>              | SepConv (k3x3)       | 2   | -   | 3   | 64  | 72   | 19x15       | <i>en_blk_52</i>   |
| <i>en_blk_52</i>              | MBConv (t7,k3x3)     | 1   | 7   | 3   | 72  | 96   | 19x15       | <i>de_blk_53</i>   |
| <i>de_blk_53</i>              | MBConv (t3,k5x5)     | 1   | 3   | 5   | 96  | 112  | 19x15       | <i>de_blk_54</i>   |
| <i>de_blk_54</i>              | MBConv (t6,k3x3)     | 1   | 6   | 3   | 112 | 1    | 19x15       | <i>depth_5</i>     |

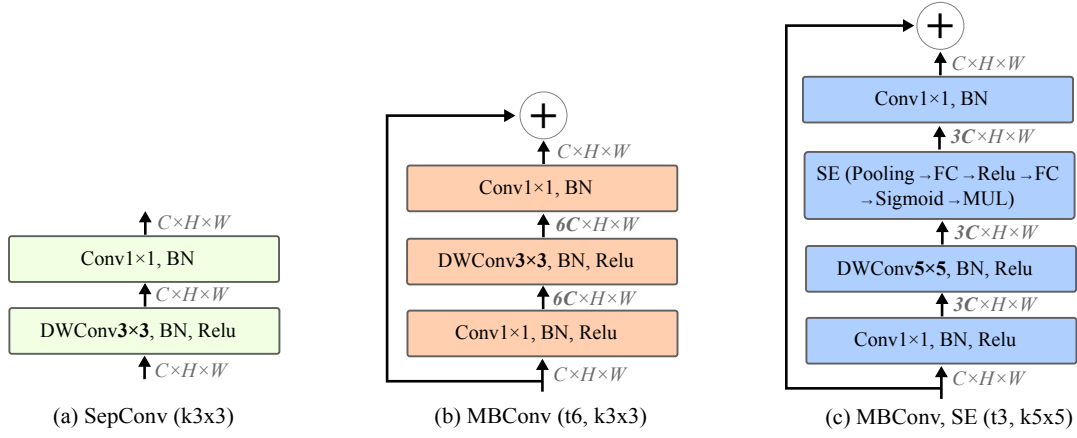

Figure 3. Detailed component of some typical operations in Table 2, 3, 4. (a) depthwise separable convolution with kernel size  $3 \times 3$ , (b) mobile invertable residual convolution block with expansion factor  $t = 6$  and kernel size  $3 \times 3$ , and (c) mobile invertable residual convolution block integrated squeeze-and-excitation module with expansion factor  $t = 3$  and kernel size  $5 \times 3$ . DWConv indicates depthwise convolution, BN denotes batch normalization and MUL is multiplication.

Table 3. Detailed structure of an LiDNAS-K instance. MBConv denotes mobile inverted residual block, SepConv indicates depthwise separable convolution, and SE is squeeze-and-excitation module (see Figure 3 for more details).  $n$  is the number of layers within the block,  $t$  is the expansion factor of the MBConv module, and  $k$  is the kernel size. #in and #out are the number of input and output channels.

| Input                       | Operations           | n | t | k | #in | #out | Resolutions | Output             |
|-----------------------------|----------------------|---|---|---|-----|------|-------------|--------------------|
| <i>image</i>                | Conv2d (k3x3)        | 2 | - | 3 | 3   | 18   | 640x192     | <i>en_blk_11</i>   |
| <i>en_blk_11</i>            | MBConv (t5,k3x3)     | 3 | 5 | 3 | 18  | 28   | 640x192     | <i>en_blk_12</i>   |
| <i>en_blk_12, up_blk_27</i> | SepConv (k3x3)       | 3 | - | 3 | 52  | 64   | 640x192     | <i>de_blk_13</i>   |
| <i>de_blk_13</i>            | MBConv (t3,k5x5)     | 2 | 3 | 5 | 64  | 72   | 640x192     | <i>de_blk_14</i>   |
| <i>de_blk_14</i>            | MBConv, SE (t7,k5x5) | 2 | 7 | 5 | 72  | 1    | 640x192     | <i>depth_1</i>     |
| <i>down(en_blk_12)</i>      | MBConv (t3,k5x5)     | 1 | 3 | 5 | 28  | 18   | 320x96      | <i>down_blk_26</i> |
| <i>up(de_blk_24)</i>        | MBConv (t6,k3x3)     | 1 | 6 | 3 | 72  | 24   | 640x192     | <i>up_blk_27</i>   |
| <i>down_blk_26</i>          | MBConv (t5,k3x3)     | 2 | 5 | 3 | 18  | 24   | 320x96      | <i>en_blk_21</i>   |
| <i>en_blk_21</i>            | SepConv (k5x5)       | 2 | - | 5 | 24  | 32   | 320x96      | <i>en_blk_22</i>   |
| <i>en_blk_12, up_blk_37</i> | MBConv (t7,k3x3)     | 1 | 7 | 3 | 48  | 56   | 320x96      | <i>de_blk_23</i>   |
| <i>de_blk_23</i>            | MBConv, SE (t3,k5x5) | 2 | 3 | 5 | 56  | 72   | 320x96      | <i>de_blk_24</i>   |
| <i>de_blk_24</i>            | MBConv (t6,k3x3)     | 2 | 6 | 3 | 72  | 1    | 320x96      | <i>depth_2</i>     |
| <i>down(en_blk_22)</i>      | MBConv (t6,k5x5)     | 1 | 6 | 5 | 32  | 32   | 160x48      | <i>down_blk_36</i> |
| <i>up(de_blk_34)</i>        | SepConv (k3x3)       | 2 | - | 3 | 92  | 16   | 320x96      | <i>up_blk_37</i>   |
| <i>down_blk_36</i>          | MBConv (t7,k3x3)     | 1 | 7 | 3 | 32  | 44   | 160x48      | <i>en_blk_31</i>   |
| <i>en_blk_31</i>            | SepConv (k3x3)       | 2 | - | 3 | 44  | 56   | 160x48      | <i>en_blk_32</i>   |
| <i>en_blk_32, up_blk_47</i> | MBConv (t5,k3x3)     | 1 | 5 | 3 | 68  | 72   | 160x48      | <i>de_blk_33</i>   |
| <i>de_blk_33</i>            | MBConv (t6,k3x3)     | 1 | 6 | 3 | 72  | 92   | 160x48      | <i>de_blk_34</i>   |
| <i>de_blk_34</i>            | MBConv, SE (t3,k5x5) | 2 | 3 | 5 | 92  | 1    | 160x48      | <i>depth_3</i>     |
| <i>down(en_blk_32)</i>      | SepConv (k3x3)       | 3 | - | 3 | 56  | 48   | 80x24       | <i>down_blk_46</i> |
| <i>up(de_blk_44)</i>        | MBConv (t6,k3x3)     | 1 | 6 | 3 | 108 | 12   | 160x48      | <i>up_blk_47</i>   |
| <i>down_blk_46</i>          | SepConv (k3x3)       | 3 | - | 3 | 48  | 56   | 80x24       | <i>en_blk_41</i>   |
| <i>en_blk_41</i>            | MBConv, SE (t3,k5x5) | 1 | 3 | 5 | 56  | 64   | 80x24       | <i>en_blk_42</i>   |
| <i>en_blk_42, up_blk_57</i> | MBConv, SE (t3,k5x5) | 2 | 3 | 5 | 78  | 88   | 80x24       | <i>de_blk_43</i>   |
| <i>de_blk_43</i>            | SepConv (k5x5)       | 2 | - | 5 | 88  | 108  | 80x24       | <i>de_blk_44</i>   |
| <i>de_blk_44</i>            | MBConv (t7,k5x5)     | 1 | 7 | 5 | 108 | 1    | 80x24       | <i>depth_4</i>     |
| <i>down(en_blk_42)</i>      | MBConv (t6,k5x5)     | 1 | 6 | 5 | 64  | 56   | 40x12       | <i>down_blk_56</i> |
| <i>up(de_blk_54)</i>        | SepConv (k3x3)       | 1 | - | 3 | 110 | 14   | 80x24       | <i>up_blk_57</i>   |
| <i>down_blk_56</i>          | MBConv, SE (t3,k5x5) | 1 | 3 | 5 | 56  | 64   | 40x12       | <i>en_blk_51</i>   |
| <i>en_blk_51</i>            | SepConv (k3x3)       | 2 | - | 3 | 64  | 72   | 40x12       | <i>en_blk_52</i>   |
| <i>en_blk_52</i>            | MBConv (t3,k5x5)     | 1 | 3 | 5 | 72  | 96   | 40x12       | <i>de_blk_53</i>   |
| <i>de_blk_53</i>            | SepConv (k5x5)       | 1 | - | 5 | 96  | 110  | 40x12       | <i>de_blk_54</i>   |
| <i>de_blk_54</i>            | MBConv (t3,k5x5)     | 2 | 3 | 5 | 110 | 1    | 40x12       | <i>depth_5</i>     |

Table 4. Detailed structure of an LiDNAS-S instance. MBConv denotes mobile inverted residual block, SepConv indicates depthwise separable convolution, and SE is squeeze-and-excitation module (see Figure 3 for more details).  $n$  is the number of layers within the block,  $t$  is the expansion factor of the MBConv module, and  $k$  is the kernel size. **#in** and **#out** are the number of input and output channels.

| <b>Input</b>                | <b>Operations</b>    | <b>n</b> | <b>t</b> | <b>k</b> | <b>#in</b> | <b>#out</b> | <b>Resolutions</b> | <b>Output</b>      |
|-----------------------------|----------------------|----------|----------|----------|------------|-------------|--------------------|--------------------|
| <i>image</i>                | Conv2d (k5x5)        | 3        | -        | 5        | 3          | 32          | 304x228            | <i>en_blk_11</i>   |
| <i>en_blk_11</i>            | MBConv (t5,k3x3)     | 3        | 5        | 3        | 32         | 48          | 304x228            | <i>en_blk_12</i>   |
| <i>en_blk_12, up_blk_27</i> | MBConv (t5,k3x3)     | 3        | 5        | 3        | 80         | 96          | 304x228            | <i>de_blk_13</i>   |
| <i>de_blk_13</i>            | MBConv (t3,k5x5)     | 3        | 3        | 5        | 96         | 110         | 304x228            | <i>de_blk_14</i>   |
| <i>de_blk_14</i>            | MBConv, SE (t7,k5x5) | 3        | 7        | 5        | 110        | 1           | 304x228            | <i>depth_1</i>     |
| <i>down(en_blk_12)</i>      | MBConv (t3,k5x5)     | 1        | 3        | 5        | 48         | 24          | 152x114            | <i>down_blk_26</i> |
| <i>up(de_blk_24)</i>        | MBConv (t6,k3x3)     | 1        | 6        | 3        | 92         | 32          | 304x228            | <i>up_blk_27</i>   |
| <i>down_blk_26</i>          | MBConv (t5,k3x3)     | 2        | 5        | 3        | 24         | 32          | 152x114            | <i>en_blk_21</i>   |
| <i>en_blk_21</i>            | MBConv, SE (t5,k3x3) | 2        | 5        | 3        | 32         | 48          | 152x114            | <i>en_blk_22</i>   |
| <i>en_blk_12, up_blk_37</i> | MBConv (t5,k5x5)     | 1        | 5        | 5        | 72         | 72          | 152x114            | <i>de_blk_23</i>   |
| <i>de_blk_23</i>            | MBConv, SE (t5,k3x3) | 2        | 5        | 3        | 72         | 92          | 152x114            | <i>de_blk_24</i>   |
| <i>de_blk_24</i>            | MBConv, SE (t7,k5x5) | 2        | 7        | 5        | 92         | 1           | 152x114            | <i>depth_2</i>     |
| <i>down(en_blk_22)</i>      | MBConv (t6,k5x5)     | 2        | 6        | 5        | 48         | 24          | 76x52              | <i>down_blk_36</i> |
| <i>up(de_blk_34)</i>        | MBConv (t5,k3x3)     | 1        | 5        | 3        | 108        | 24          | 152x114            | <i>up_blk_37</i>   |
| <i>down_blk_36</i>          | SepConv (k3x3)       | 3        | -        | 3        | 24         | 36          | 76x52              | <i>en_blk_31</i>   |
| <i>en_blk_31</i>            | MBConv, SE (t7,k3x3) | 2        | 7        | 3        | 36         | 48          | 76x52              | <i>en_blk_32</i>   |
| <i>en_blk_32, up_blk_47</i> | MBConv (t3,k5x5)     | 2        | 3        | 5        | 82         | 96          | 76x52              | <i>de_blk_33</i>   |
| <i>de_blk_33</i>            | MBConv (t6,k3x3)     | 1        | 6        | 3        | 96         | 108         | 76x52              | <i>de_blk_34</i>   |
| <i>de_blk_34</i>            | MBConv, SE (t6,k5x5) | 2        | 6        | 5        | 108        | 1           | 76x52              | <i>depth_3</i>     |
| <i>down(en_blk_32)</i>      | MBConv (t3,k5x5)     | 2        | 3        | 5        | 48         | 32          | 37x26              | <i>down_blk_46</i> |
| <i>up(de_blk_44)</i>        | MBConv (t6,k3x3)     | 2        | 6        | 3        | 114        | 34          | 76x52              | <i>up_blk_47</i>   |
| <i>down_blk_46</i>          | SepConv (k3x3)       | 3        | -        | 3        | 32         | 52          | 37x26              | <i>en_blk_41</i>   |
| <i>en_blk_41</i>            | MBConv, SE (t3,k5x5) | 1        | 3        | 5        | 52         | 60          | 37x26              | <i>en_blk_42</i>   |
| <i>en_blk_42, up_blk_57</i> | MBConv, SE (t3,k5x5) | 2        | 3        | 5        | 92         | 92          | 37x26              | <i>de_blk_43</i>   |
| <i>de_blk_43</i>            | MBConv, SE (t3,k5x5) | 2        | 3        | 5        | 92         | 114         | 37x26              | <i>de_blk_44</i>   |
| <i>de_blk_44</i>            | MBConv, SE (t5,k3x3) | 2        | 5        | 3        | 114        | 1           | 37x26              | <i>depth_4</i>     |

## References

- [1] Angela Dai, Angel X Chang, Manolis Savva, Maciej Halber, Thomas Funkhouser, and Matthias Nießner. Scannet: Richly-annotated 3d reconstructions of indoor scenes. In *CVPR*, pages 5828–5839, 2017.
- [2] Andreas Geiger, Philip Lenz, Christoph Stiller, and Raquel Urtasun. Vision meets robotics: The kitti dataset. *IJRR*, 32(11):1231–1237, 2013.
- [3] Fred Glover. Future paths for integer programming and links to artificial intelligence. *Computers & operations research*, 13(5):533–549, 1986.
- [4] Nathan Silberman, Derek Hoiem, Pushmeet Kohli, and Rob Fergus. Indoor segmentation and support inference from rgb-d images. In *ECCV*, pages 746–760. Springer, 2012.
